# Supplementary material for: Generation of non-viral, transgene-free hepatocyte like cells with piggyBac transposon
Source: PubMed Central journal article supplement (PMC5353749; doi:10.1038/srep44498), 2017-03-15
Supplement: srep44498-s1.pdf [file srep44498-s1.pdf]

Generation of non-viral, transgene-free hepatocyte like cells with *piggyBac* transposon.

Hokahiro Katayama<sup>1</sup>, Kentaro Yasuchika<sup>1,\*</sup>, Yuya Miyauchi<sup>1</sup>, Hidenobu Kojima<sup>1</sup>, Ryoya Yamaoka<sup>1</sup>, Takayuki Kawai<sup>1</sup>, Elena Yukie Yoshitoshi<sup>1,2</sup>, Satoshi Ogiso<sup>1</sup>, Sadahiko Kita<sup>1</sup>, Katsutaro Yasuda<sup>1,2</sup>, Naoya Sasaki<sup>1</sup>, Ken Fukumitsu<sup>1</sup>, Junji Komori<sup>1</sup>, Takamichi Ishii<sup>1</sup> and Shinji Uemoto<sup>1</sup>

<sup>1</sup>Department of Surgery, Graduate School of Medicine, Kyoto University, Kyoto, Japan

<sup>2</sup>Center for iPS Cell Research and Application (CiRA), Kyoto University, Kyoto, Japan

**S1**

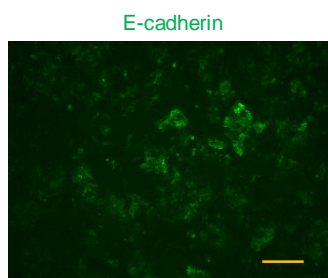

**S2**

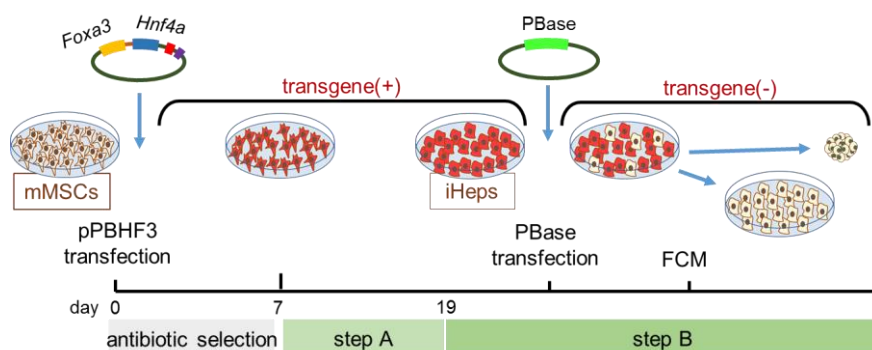

**Supplementary Figure. (S1)** Immunofluorescent staining for E-cadherin on day 15 of differentiation step. Scale bar : 200um. **(S2)** Schematic image of whole protocol is described.

|                  | forward               | reverse                |
|------------------|-----------------------|------------------------|
| <b>Aat</b>       | TTGACGTGCACTATTGCAGC  | TGTTCTCTCTCATCGATGG    |
| <b>Actb</b>      | AGGGAAATCGTGCGTGACAT  | GCTAGGAGCCAGAGCAGTAATC |
| <b>Afp</b>       | ACAGGAGGCTATGCATCACC  | TGGACATCTTCACCATGTGG   |
| <b>Alb</b>       | GACAAGGAAAGCTGCCTGAC  | TTCTGCAAAGTCAGCATTGG   |
| <b>Acta2</b>     | CTATTCAGGCTGTGCTGTCC  | AGTTCGTAGCTCTTCTCCAGG  |
| <b>CK18</b>      | AAGATCATGGCGGACATCC   | CTGACTCCAGATGCAGAAGG   |
| <b>CK19</b>      | GTGCCACCATTGACAACCTCC | AATCCACCTCCACACTGACC   |
| <b>Cyp2e1</b>    | TGGTCCTGCATGGCTACAAG  | CGGGCCTCATTACCCTGTTT   |
| <b>Cyp3a11</b>   | AGCAGGGATGGACCTGGTTT  | CAGCAAGGAGAGGCGTTTGA   |
| <b>Cdh1</b>      | GCCACAGATGATGGTTCACC  | CTTCATGCAGTTGTTGACCG   |
| <b>G6P</b>       | AAGTCGTTCCCATTCGCTT   | CAAAGGGAAGTGTGCGCTC    |
| <b>Tat</b>       | TCCAGGAGTTCTGTGAACAGC | AGTATATGGTGCCTGCCTGC   |
| <b>Ttr</b>       | ATGAATTCGCGGATGTGG    | TTCCTGAGCTGCTAACACGG   |
| <b>Vim</b>       | TACCAGGACACTATTGGCCG  | CTGTTGCACCAAGTGTGTGC   |
| <b>transgene</b> | TGAGGGCAGACATAGCACAG  | AGTTCTTGCAGCTCGGTGAC   |

**Supplementary Table. (S1)** Primers for PCR analyses are listed.
